# Supplementary material
Source: HighWire-hosted journal article supplement (http://www.annfammed.org/highwire/filestream/723/field_highwire_adjunct_files/0/Duffy-inno_Supp_App.pdf)
Supplement: Duffy-inno_Supp_App.pdf [file Duffy-inno_Supp_App.pdf]

## Supplemental materials for:

Duffy S, Svenson J, Chavez A, Kelly M, Wise P. Empowering community health workers with mobile technology to treat diabetes. *Ann Fam Med*. 2019;17(2):176.

Sean Duffy, MD<sup>1</sup>

Jim Svenson, MD, MS<sup>1</sup>

Alejandro Chavez<sup>2</sup>

Mark Kelly<sup>1</sup>

Paul Wise, MD, MPH<sup>2</sup>

<sup>1</sup>University of Wisconsin School of Medicine and Public Health, Madison, Wisconsin

<sup>2</sup>Stanford University School of Medicine, Palo Alto, California

**Acknowledgements:** The authors would like to thank Dr. Rafael Tun, the medical director for the community health worker program, for his work in helping to develop clinical protocols and program workflows, as well as his care for patients referred by the health workers. The health workers themselves - particularly Jose Vicente Macario, Cesia Castro Chutá, Olga Marina Ajcalon Cuc, and Dominga Pic Salazar - have been instrumental in all phases of this project, which would be impossible without their hard work and dedication to patient care. Dr. David Rabago provided guidance on this project and helped to frame and edit this manuscript.

This project was funded by a grant from the University of Wisconsin-Madison Global Health Institute. Dr. Duffy was also supported by the NRSA Primary Care Postdoctoral Research Traineeship awarded by the NIH Health Resources Services Administration (HRSA grant T32 HP10010) during a portion of the time spent working on this project.

The University of Wisconsin and Stanford University IRBs reviewed and approved this project.

## REFERENCES

1. World Health Organization. Global Report on Diabetes. World Health Organization; 2016. [http://apps.who.int/iris/bitstream/10665/204871/1/9789241565257\\_eng.pdf?ua=1](http://apps.who.int/iris/bitstream/10665/204871/1/9789241565257_eng.pdf?ua=1).
2. International Diabetes Foundation. IDF Diabetes Atlas, 8th ed. IDF; 2017.
3. World Health Organization. Global Status Report on Noncommunicable Disease 2014. World Health Organization; 2014. [http://apps.who.int/iris/bitstream/10665/148114/1/9789241564854\\_eng.pdf?ua=1](http://apps.who.int/iris/bitstream/10665/148114/1/9789241564854_eng.pdf?ua=1).
4. Hunter DJ, Reddy KS. Noncommunicable diseases. *N Engl J Med*. 2013;369(14):1336-1343.
5. Alaofè H, Asaolu I, Ehiri J, et al. Community health workers in diabetes prevention and management in developing countries. *Ann Glob Health*. 2017;83(3-4):661-675.

6. Mishra SR, Neupane D, Preen D, Kallestrup P, Perry HB. Mitigation of non-communicable diseases in developing countries with community health workers. *Global Health*. 2015;11:43.
7. Ruddock JS, Poindexter M, Gary-Webb TL, Walker EA, Davis NJ. Innovative strategies to improve diabetes outcomes in disadvantaged populations. *Diabet Med*. 2016;33(6):723-733.
8. Jeet G, Thakur JS, Prinja S, Singh M. Community health workers for non-communicable diseases prevention and control in developing countries: Evidence and implications. *PLoS One*. 2017;12(7):e0180640.
9. Ajay VS, Prabhakaran D. The scope of cell phones in diabetes management in developing country health care settings. *J Diabetes Sci Technol*. 2011;5(3):778-783.
10. Maia JX, de Sousa LAP, Marcolino MS, et al. The Impact of a Clinical Decision Support System in Diabetes Primary Care Patients in a Developing Country. *Diabetes Technol Ther*. 2016;18(4):258-263.
11. Beratarrechea A, Moyano D, Irazola V, Rubinstein A. mHealth Interventions to Counter Noncommunicable Diseases in Developing Countries: Still an Uncertain Promise. *Cardiol Clin*. 2017;35(1):13-30.
12. Vedanthan R, Bernabe-Ortiz A, Herasme OI, et al. Innovative Approaches to Hypertension Control in Low- and Middle-Income Countries. *Cardiol Clin*. 2017;35(1):99-115.
13. Källander K, Tibenderana JK, Akpogheneta OJ, et al. *Mobile health (mHealth)* approaches and lessons for increased performance and retention of community health workers in low- and middle-income countries: a review. *J Med Internet Res*. 2013;15(1):e17.
14. White A, Thomas DSK, Ezeanochie N, Bull S. Health worker mHealth utilization: a systematic review. *Comput Inform Nurs*. 2016;34(5):206-213.
15. Agarwal S, Perry HB, Long L-A, Labrique AB. Evidence on feasibility and effective use of mHealth strategies by frontline health workers in developing countries: systematic review. *Trop Med Int Health*. 2015;20(8):1003-1014.
16. Braun R, Catalani C, Wimbush J, Israelski D. Community health workers and mobile technology: a systematic review of the literature. *PLoS One*. 2013;8(6):e65772.
17. Trump LJ, Mendenhall TJ. Community health workers in diabetes care: A systematic review of randomized controlled trials. *Fam Syst Health*. 2017;35(3):320-340.
